# Supplementary material for: Spatial risk modelling of highly pathogenic avian influenza in France: Fattening duck farm activity matters
Source: PubMed Central journal article supplement (PMC11793745; doi:10.1371/journal.pone.0316248), 2025-02-04
Supplement: pone.0316248.s003.pdf [file pone.0316248.s003.pdf]

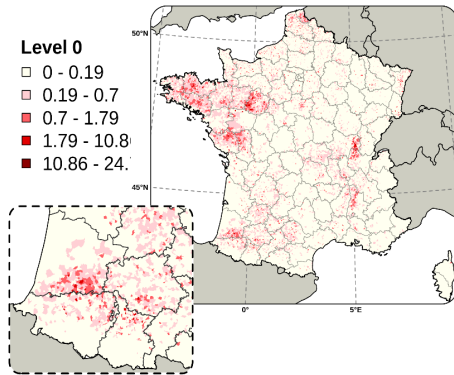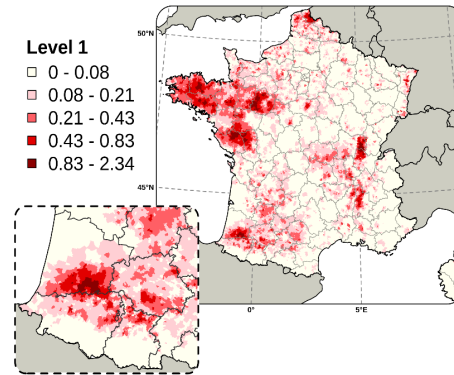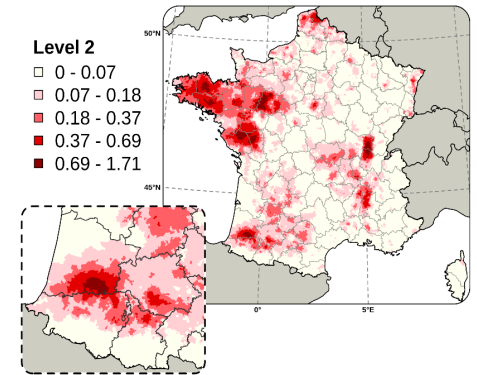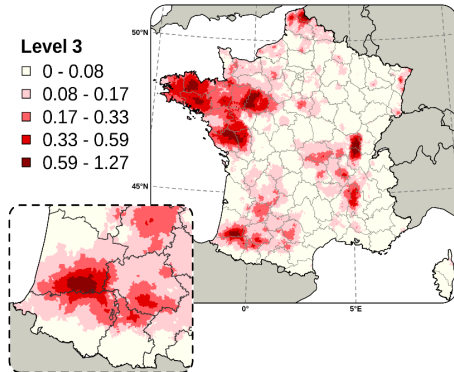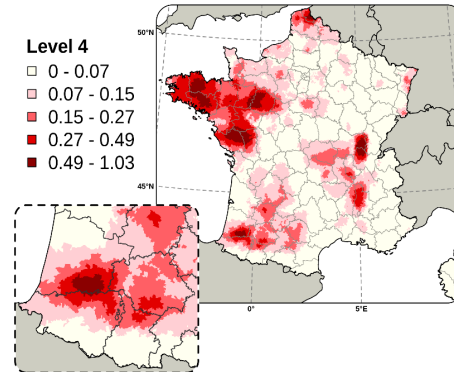

S1 File. Spatial distribution of predictor variables. Density of chicken houses (/km<sup>2</sup>).

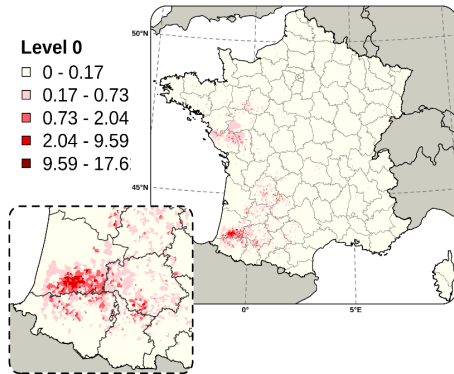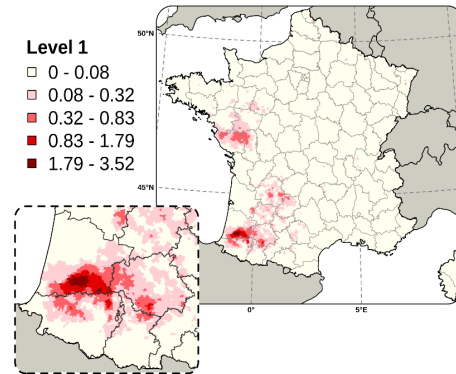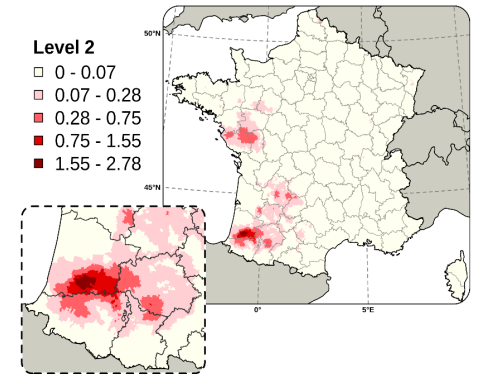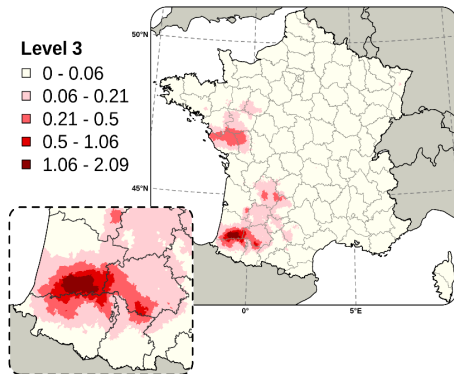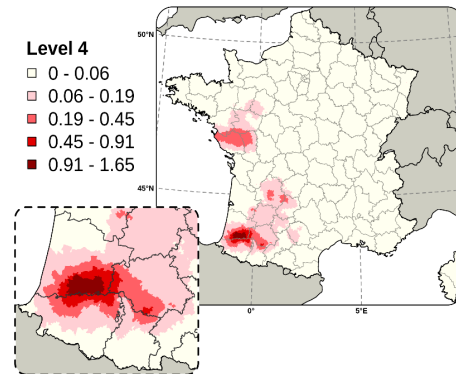

S1 File. Spatial distribution of predictor variables. Density of duck houses (/km<sup>2</sup>)

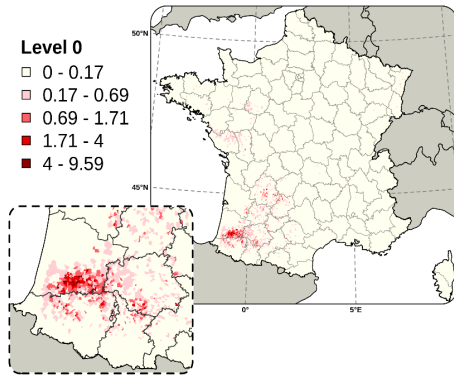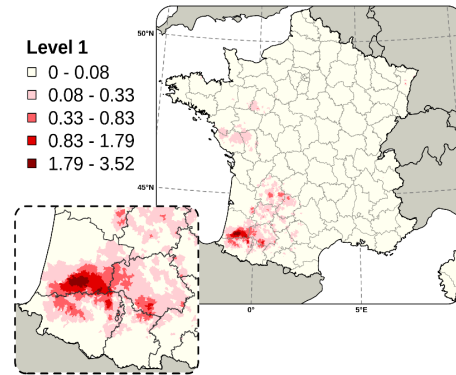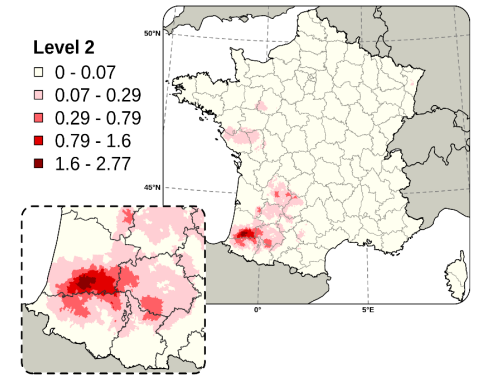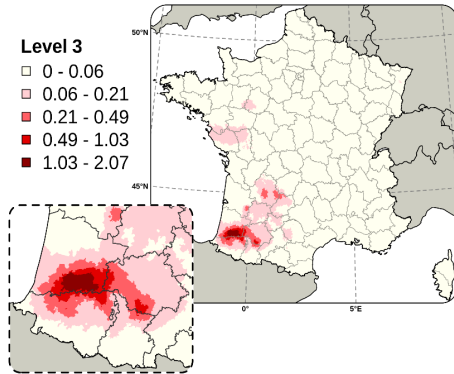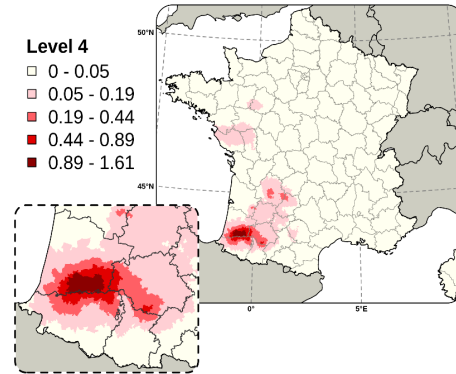

**S1 File. Spatial distribution of predictor variables. Density of fattening duck (all stages) houses (/km<sup>2</sup>).**

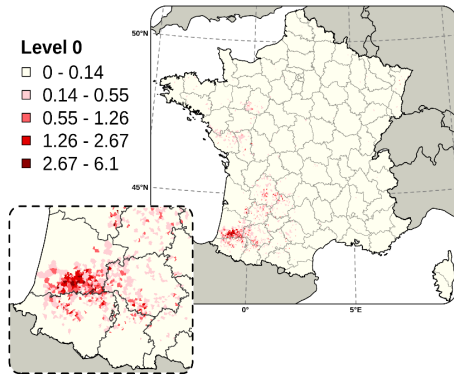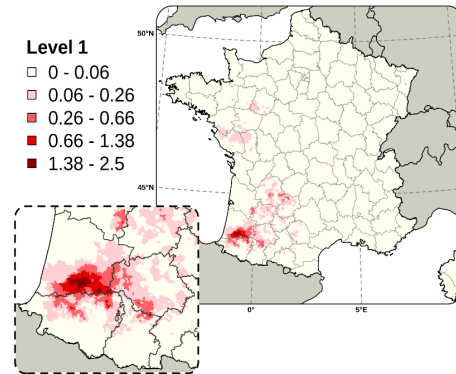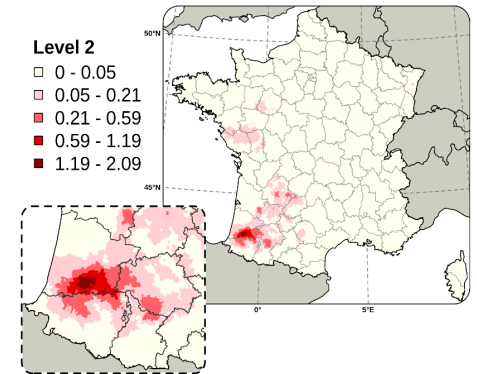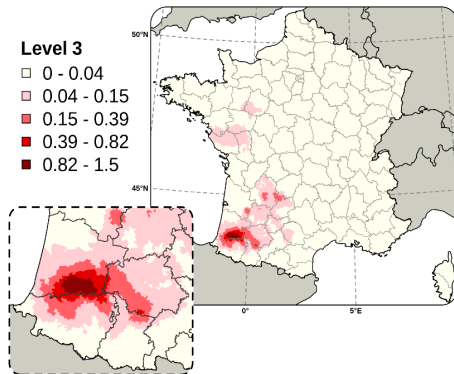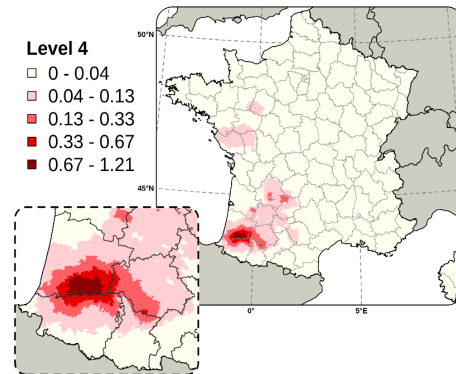

**S1 File. Spatial distribution of predictor variables. Density of fattening duck (breeding stage) houses (/km<sup>2</sup>).**

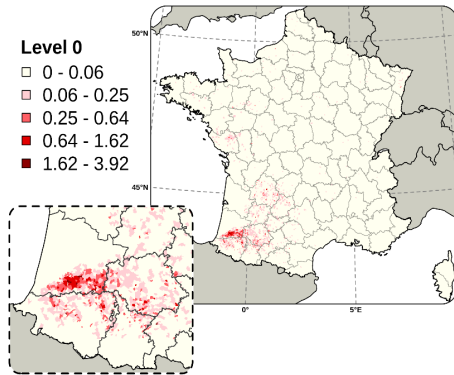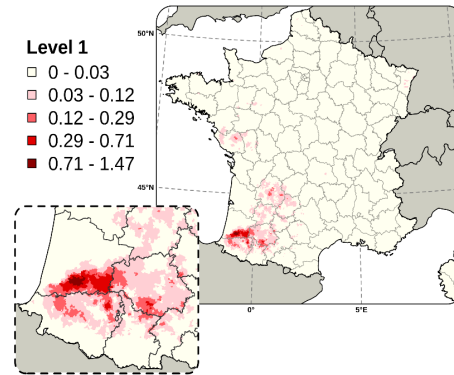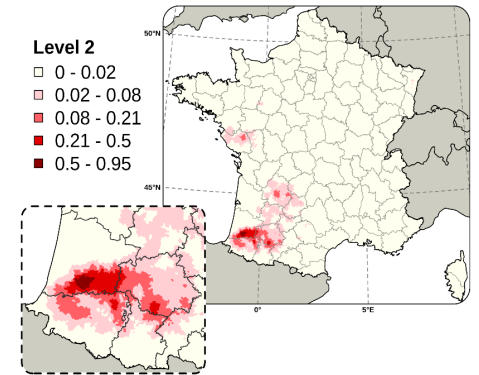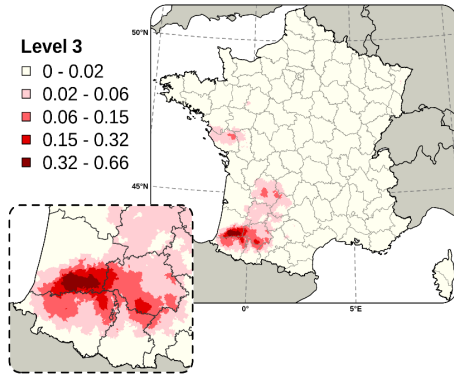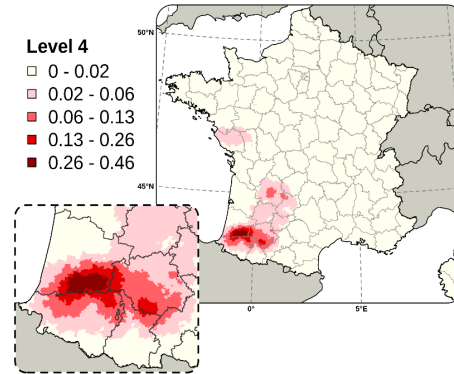

S1 File. Spatial distribution of predictor variables. Density of fattening duck (force-feeding stage) houses (/km<sup>2</sup>).

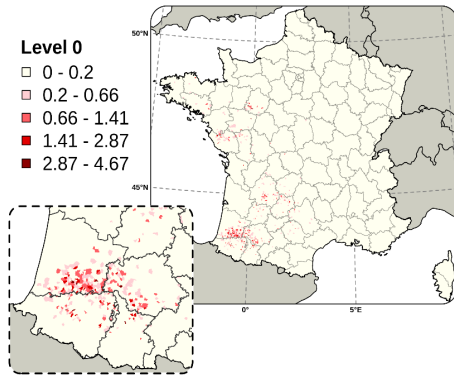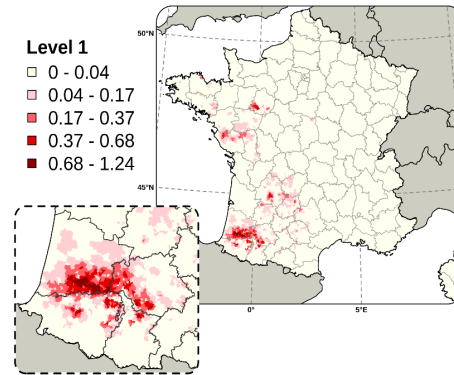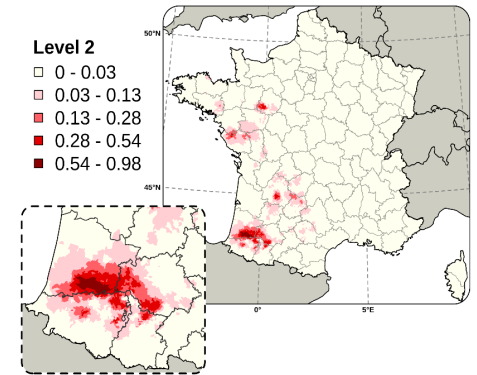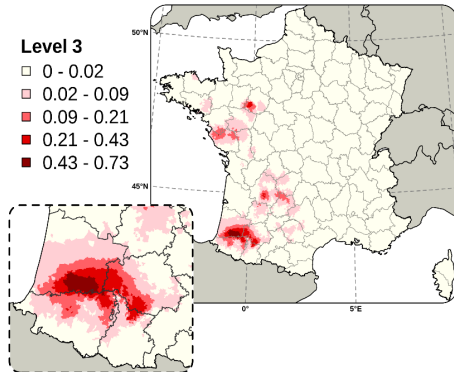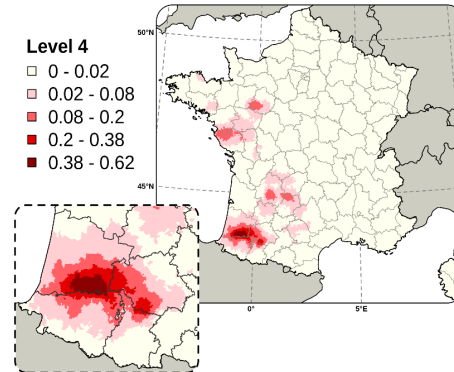

**S1 File. Spatial distribution of predictor variables.** Density of outgoing fattening duck flock movements (breeding to force-feeding stage) (/km<sup>2</sup>).



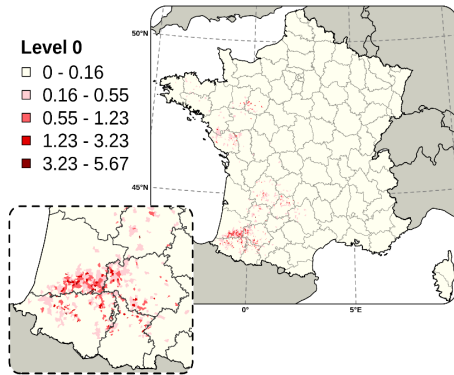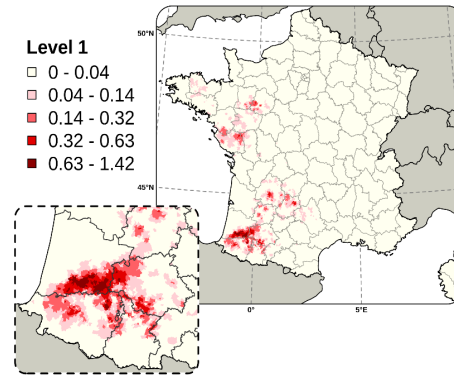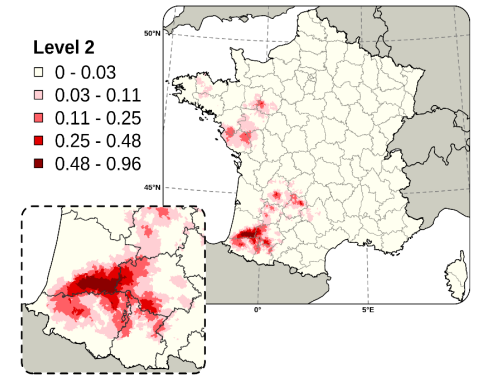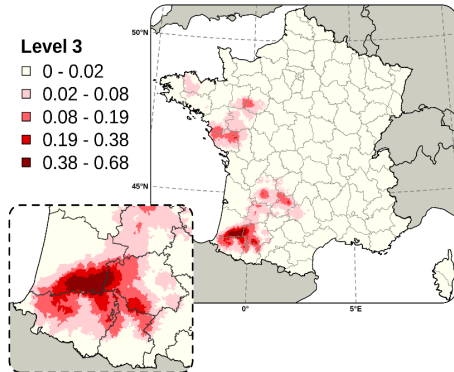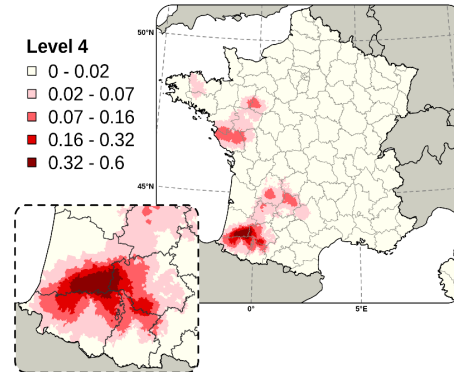

**S1 File. Spatial distribution of predictor variables.** Density of incoming fattening duck flock movements (breeding to force-feeding stage) (/km<sup>2</sup>).

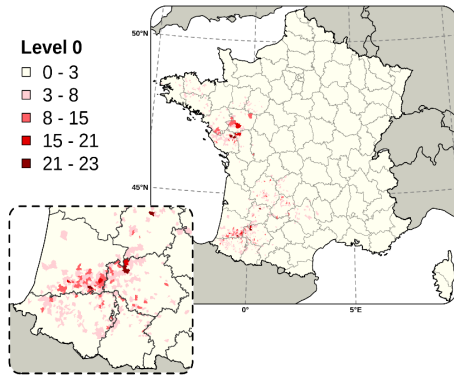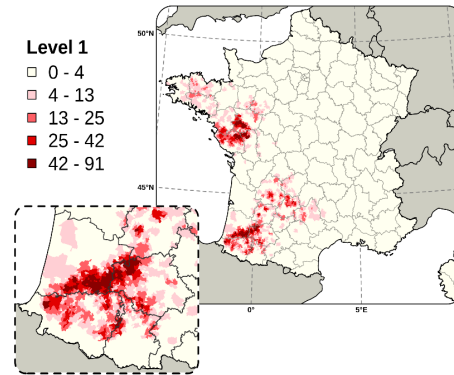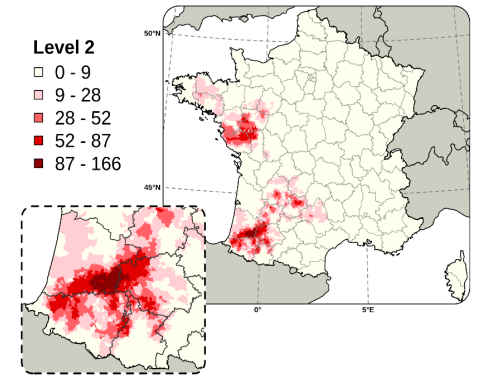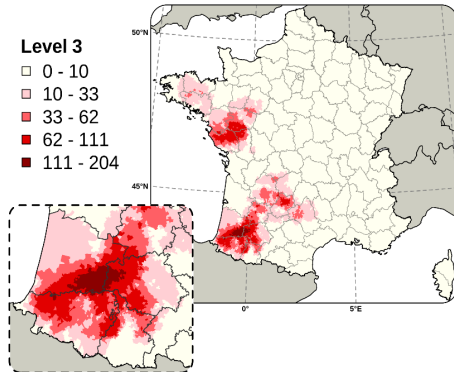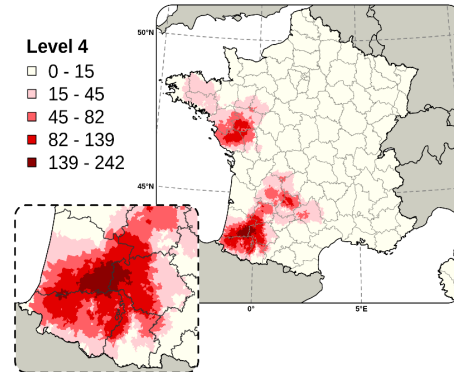

6

**S1 File. Spatial distribution of predictor variables.** Number of municipalities sending fattening duck flocks to the given municipality (breeding to force-feeding stage).
